# Supplementary material
Source: publisher site journal article supplement (https://www.dovepress.com/article/593891)
Supplement: Supplementary file 1 [file 593891%20Revised%20Supplementary%20Files.docx]

**Supplementary Files**

**Table S1.** Sensitivity, Specificity, Positive Predictive Value (PPV), and Negative Predictive Value (NPV) of the Quantitative-CERT (Q-CERT).

| Q-CERT Total Scores | Sensitivity, % | Specificity, % | PPV, % | NPV, % |
| --- | --- | --- | --- | --- |
| 1 | 100 | 59.2 | 75.2 | 100 |
| 2 | 100 | 63.1 | 77.0 | 100 |
| 3 | 100 | 70.8 | 80.9 | 100 |
| 4 | 96.9 | 74.6 | 82.5 | 95.1 |
| 5 | 89.4 | 83.8 | 87.3 | 86.5 |
| 6 | 78.9 | 93.1 | 93.4 | 78.1 |
| 7 | 69.6 | 95.4 | 94.9 | 71.7 |
| 8 | 59.6 | 100 | 100 | 66.7 |
| 9 | 45.3 | 100 | 100 | 59.6 |
| 10 | 36.6 | 100 | 100 | 56.0 |
| 11 | 31.7 | 100 | 100 | 54.2 |
| 12 | 23.6 | 100 | 100 | 51.4 |
| 13 | 17.4 | 100 | 100 | 49.4 |
| 14 | 7.5 | 100 | 100 | 46.6 |
| 15 | 3.7 | 100 | 100 | 45.6 |

**
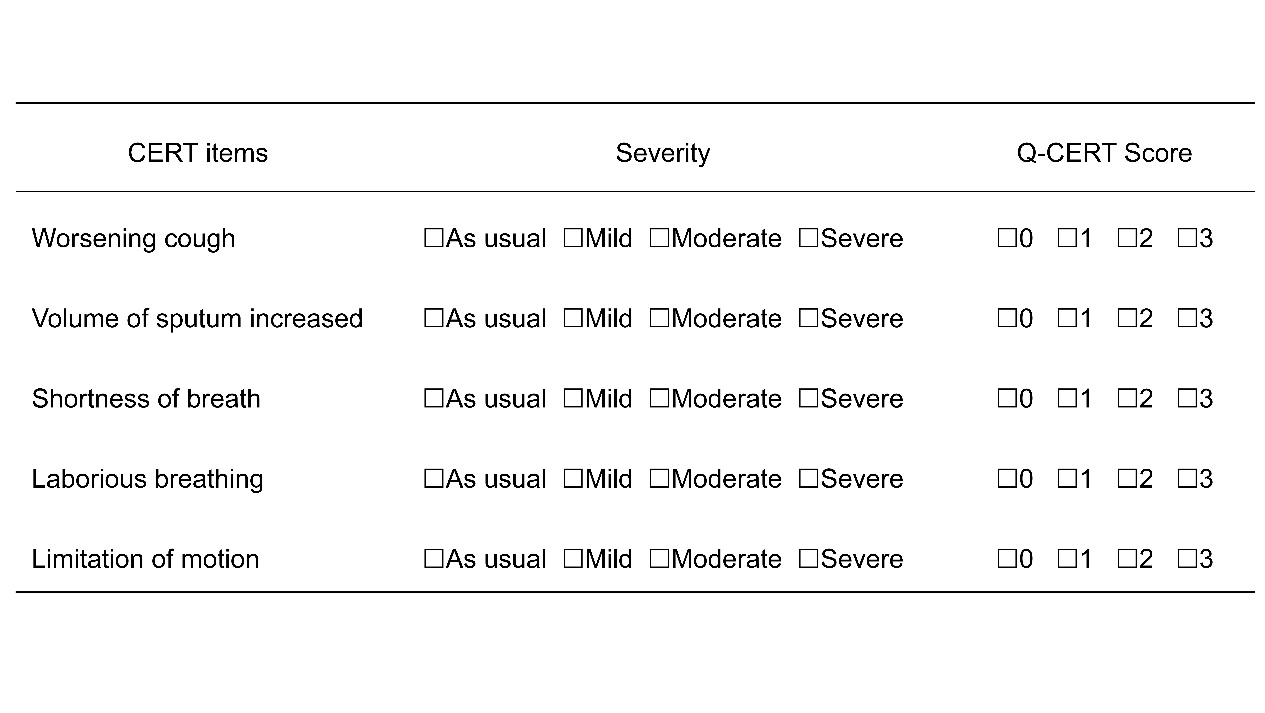
Figure S1.** CERT and Q-CERT Items for Recognizing COPD Exacerbations. COPD, Chronic obstructive pulmonary disease; CERT, Clinical COPD exacerbation recognition tool; Q-CERT, Quantitative-CERT.
